# Supplementary material for: The synthesis and bioimaging of a biocompatible hydrogen sulfide fluorescent probe with high sensitivity and selectivity
Source: Royal Society of Chemistry journal article supplement (doi:10.1039/c9an02323b), 2020-01-01
Supplement: c9an02323b1.pdf [file c9an02323b1.pdf]

## **Synthesis and Bioimaging of a Biocompatible Hydrogen Sulfide**

### **Fluorescent Probe with High Sensitivity and Selectivity**

Ruqiao Zhou<sup>a</sup>, Guiling Cui<sup>b</sup>, Qingrong Qi<sup>b</sup>, Wencai Huang<sup>c</sup>, Li Yang<sup>a\*</sup>

<sup>a</sup> State Key Laboratory of Biotherapy and Cancer Center, West China Hospital, Sichuan University, Chengdu, Sichuan 610041, P.R. China

<sup>b</sup> West China School of Pharmacy, Sichuan University, Chengdu, 610041

<sup>c</sup> School of Chemical Engineering, Sichuan University, Chengdu 610065.

**Table 1.** Isophoronitrile fluorescent probes reported in the literature

| Reference | structure                                                                           | F.L. intensity | Stokes shift | Detection limit | Response time | Biosystem imaging  |
|-----------|-------------------------------------------------------------------------------------|----------------|--------------|-----------------|---------------|--------------------|
| 1         | 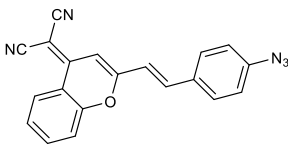   | 670 nm         | 150 nm       | 3050 nM         | 60 min        | Cells<br>Mice      |
| 2         | 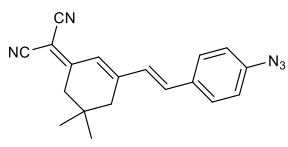   | 643 nm         | 171 nm       | 130 nM          | 20 min        | Not mentioned      |
| 3         | 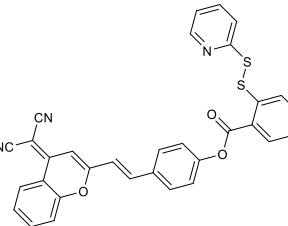   | 680 nm         | 120 nm       | 1.1 nM          | 35 min        | Hela cells         |
| 4         | 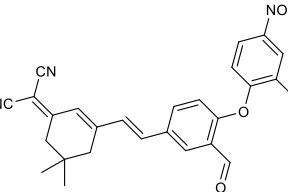  | 660 nm         | 170 nm       | 59 nM           | 15 min        | MC7 cells<br>Mice  |
| 5         | 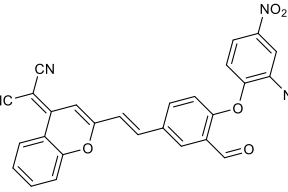 | 676 nm         | 137 nm       | 83 nM           | 8 min         | Hela cells         |
| 6         | 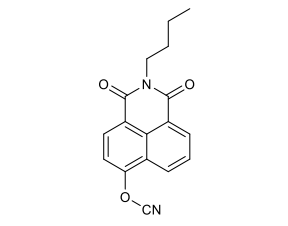 | 552 nm         | 167 nm       | 240 nM          | 30 min        | Hela cells         |
| 7         | 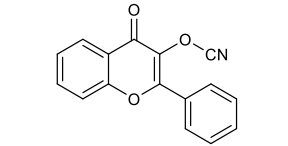 | 525 nm         | 100 nm       | 250 nM          | 15 min        | A549 cells         |
| This work | 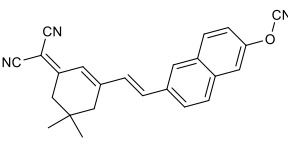 | 618 nm         | 178 nm       | 50 nM           | 15 min        | MC38 cells<br>Mice |

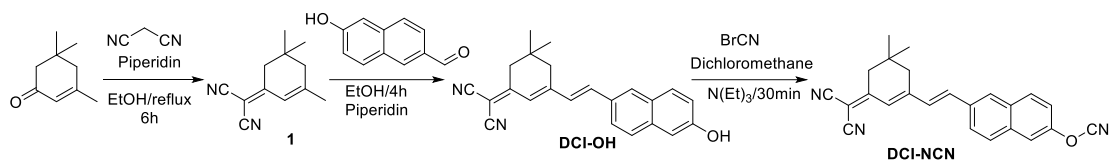

**Scheme 1** synthesis route of compound DCI-NCN

### Synthesis of compound 1

Isophorone (0.69 g, 5 mmol) and malononitrile (0.40 g, 6 mmol) were dissolved in absolute ethanol (10 mL), then a catalytic amount of piperidine was added and the mixture was refluxed 6 hours under nitrogen. The reaction was monitored by TLC. After completion of the reaction, the solvent was removed, the precipitate was dissolved in dichloromethane, washed with water and dried over anhydrous sodium sulfate. Finally, the solvent was evaporated under reduced pressure and purified by column chromatography (Cyclohexane: EtOAc=8:1) to give a colorless crystal 0.72g, yield: 78%.

$^1\text{H}$  NMR (400 MHz, Chloroform-*d*)  $\delta$  6.61 – 6.57 (m, 1H), 2.49 (s, 3H), 2.01 (d,  $J$  = 1.4 Hz, 4H), 0.99 (s, 6H).  $^{13}\text{C}$  NMR (101 MHz, Chloroform-*d*)  $\delta$  170.36, 159.78, 120.56, 113.17, 112.39, 78.22, 45.67, 42.64, 32.36, 27.80, 25.29.

### Synthesis of DCI-OH

Isophorone dinitrile 372 mg (2 mmol, 1 equiv), 6-hydroxy-2-naphthaldehyde 345 mg (2 mmol, 1 equiv) was added to a 25 ml reaction flask. After addition of 10 ml of absolute ethanol and 3 drops of piperidine was added, the mixture was stirred at reflux for 8 h. The reaction was monitored by TLC. After the reaction is completed, it is cooled to room temperature, and concentrated to remove the reaction solvent. The crude product was purified by column chromatography (dichloromethane) to give Orange yellow solid 400 mg, yield: 69%.

$^1\text{H}$  NMR (400 MHz, DMSO-*d*<sub>6</sub>)  $\delta$  10.03 (s, 1H), 8.03 (s, 1H), 7.82 (d,  $J$  = 8.7 Hz, 1H), 7.77 (d,  $J$  = 8.8 Hz, 1H), 7.70 (d,  $J$  = 8.7 Hz, 1H), 7.44 (q,  $J$  = 16.1 Hz, 2H), 7.11 (d,  $J$  = 12.7 Hz, 2H), 6.90 (s, 1H), 2.62 (s, 2H), 2.59 (s, 2H), 1.03 (s, 6H).  $^{13}\text{C}$  NMR (100 MHz, DMSO-*d*<sub>6</sub>)  $\delta$  170.67, 157.15, 156.63, 138.67, 135.79, 131.04, 130.66, 129.63, 128.82, 128.05, 127.23, 124.73, 122.69, 119.73, 114.46, 113.66, 109.54, 76.09, 42.77, 38.68, 32.13, 27.93.

### Synthesis of probe DCI-NCN.

To a solution of DCI-OH (125 mg, 0.34 mmol) in dichloromethane (10 ml) was added cyanogen bromide (35.7 mg, 0.34mmol) in dichloromethane (2 ml) dropwise, followed by the addition of 3 drops of triethylamine at 0°C. The resulting mixture was stirred for 30 min at room temperature. The reaction was monitored by TLC. After completion of the reaction, solvent was removed in vacuo and the residue was purified by column chromatography to give 90 mg yellow solid, yield: 77%.

$^1\text{H}$  NMR (400 MHz, CDCl<sub>3</sub>)  $\delta$  7.94 (dd,  $J$  = 5.3, 3.8 Hz, 2H), 7.88 (d,  $J$  = 8.7 Hz, 1H), 7.79 (dd,  $J$  = 5.7, 2.4 Hz, 2H), 7.41 (dd,  $J$  = 9.1, 2.7 Hz, 1H), 7.21 (d,  $J$  = 16.1 Hz, 1H), 7.13 (d,  $J$  = 16.1 Hz, 1H), 6.92 (s, 1H), 2.63 (s, 2H), 2.52 (s, 2H), 1.11 (s, 6H).  $^{13}\text{C}$  NMR (100 MHz, CDCl<sub>3</sub>)  $\delta$  169.06, 151.19, 135.99, 134.16, 131.70, 131.47, 130.39, 128.51, 128.37, 125.54, 124.22, 115.81, 113.34, 112.61, 111.88, 108.56, 43.01, 39.30, 32.08, 28.05. HRMS(ESI):  $m/z$ [M+CH<sub>3</sub>OH<sub>2</sub>]<sup>+</sup> calcd for 398.1849, found 398.1841

optimal configuration

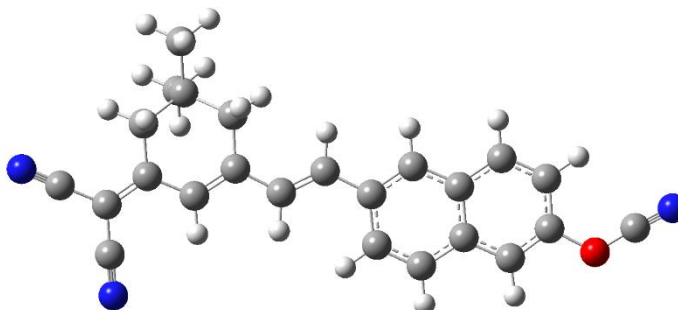

Fig. S1 The optimal configuration of DCI-NCN

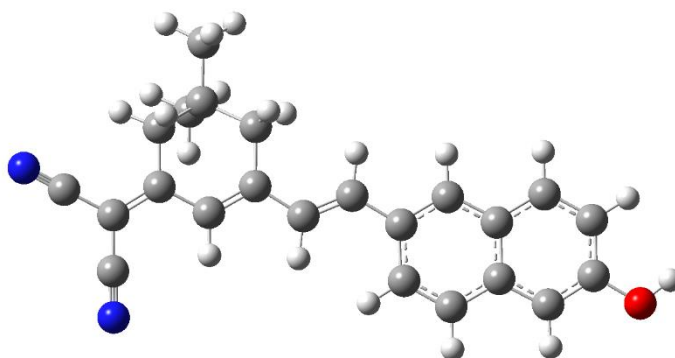

Fig. S2 The optimal configuration of DCI-OH

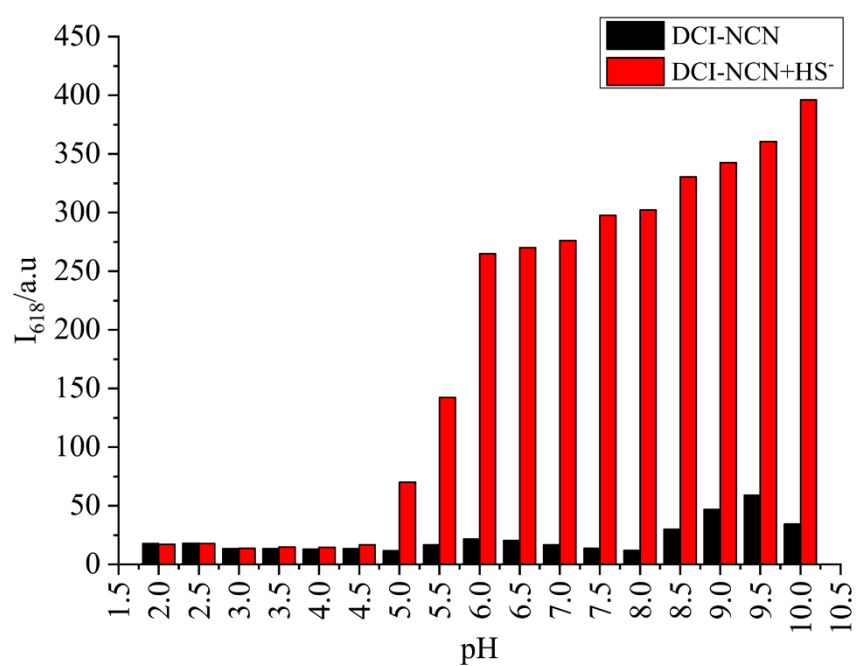

Fig. S3 Fluorescence intensity changed at 618 nm with Na<sub>2</sub>S upon different pH with  $\lambda_{ex}$  at 440 nm at 25°C.

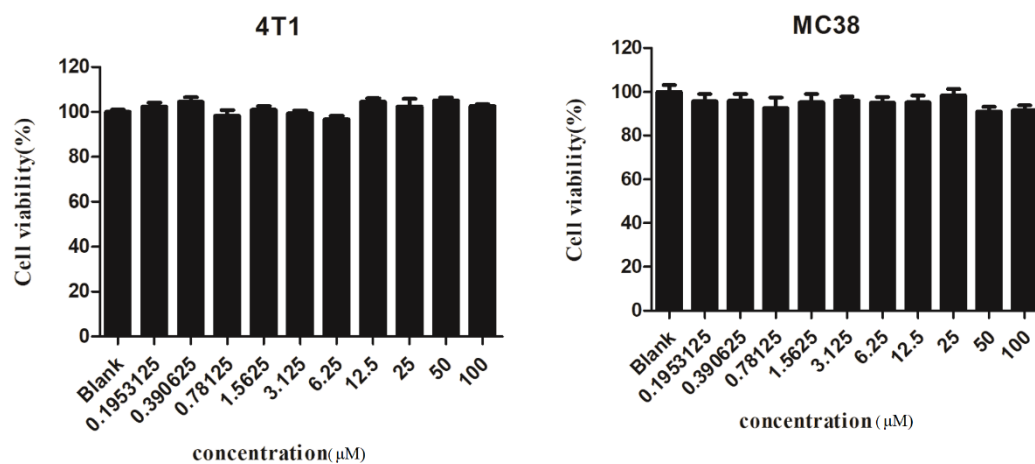

Fig. S4 Cytotoxicity of probe DCI-NCN to 4T1 and MC38 cells

## Spectral Characterization

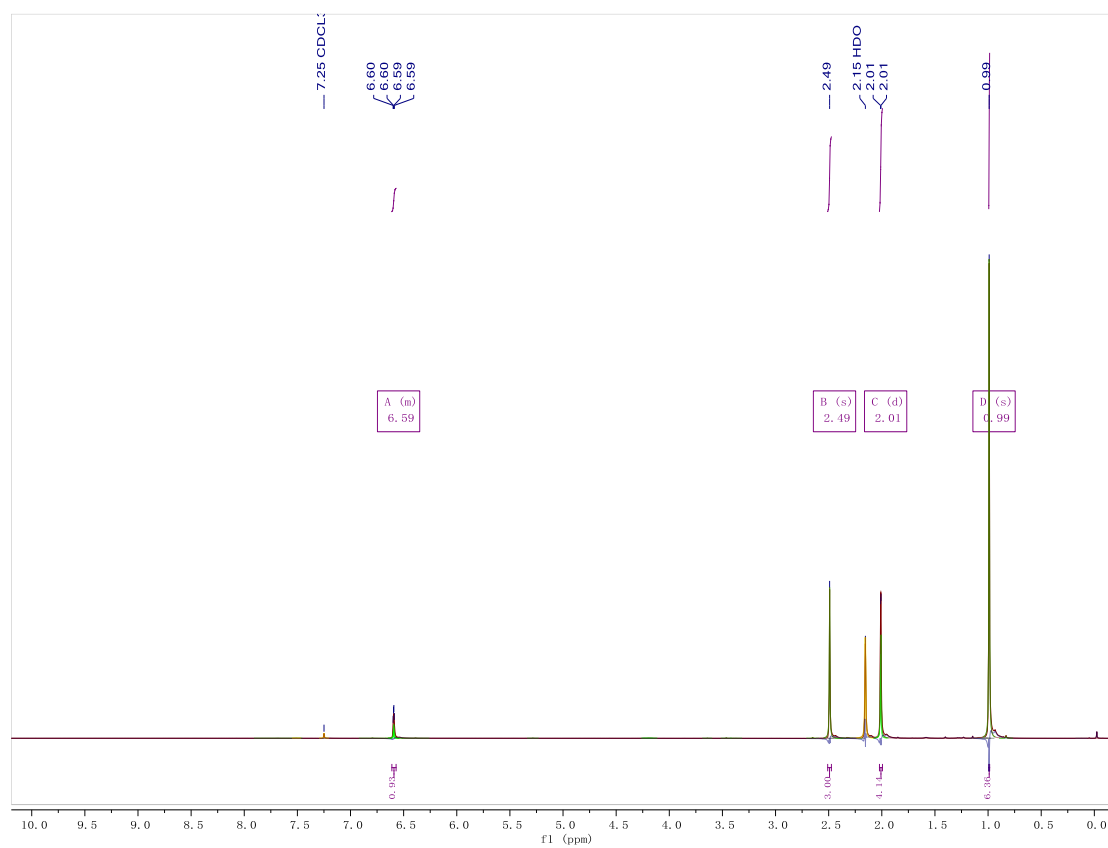

Fig. S5  $^1\text{H}$ NMR spectrum of the compound 1

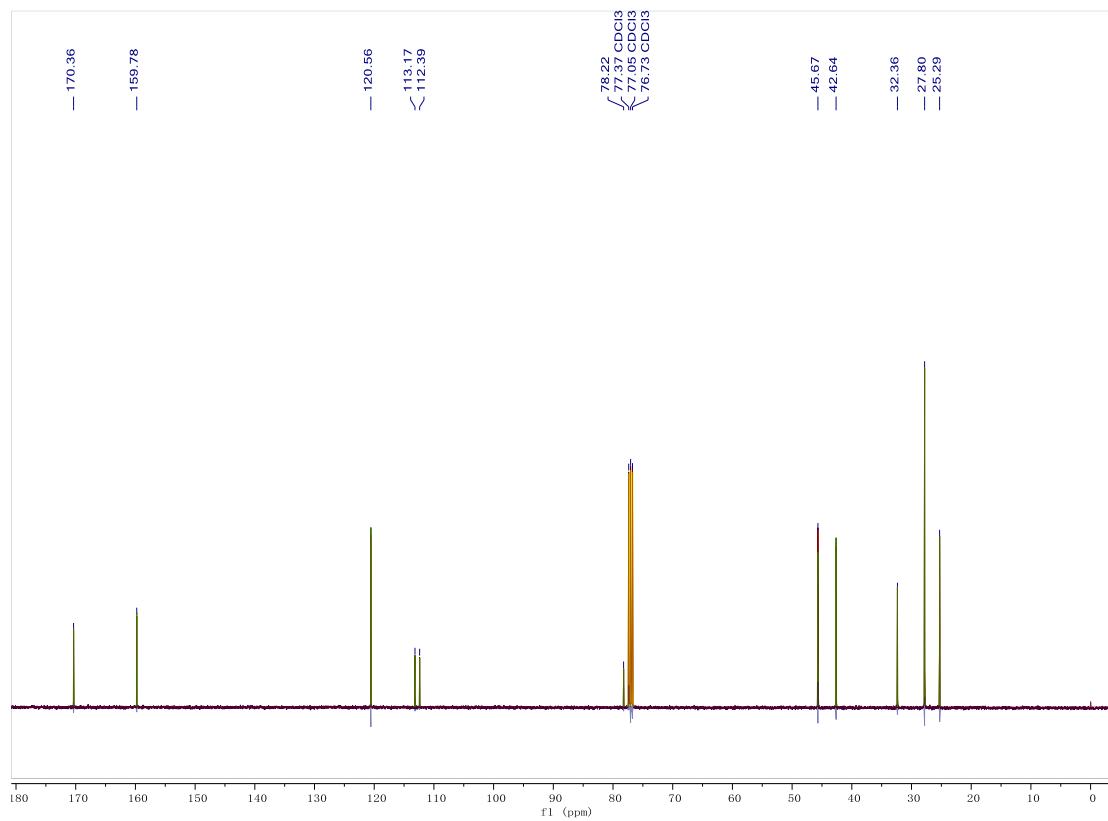

Fig. S6  $^{13}\text{C}$ NMR spectrum of the compound 1

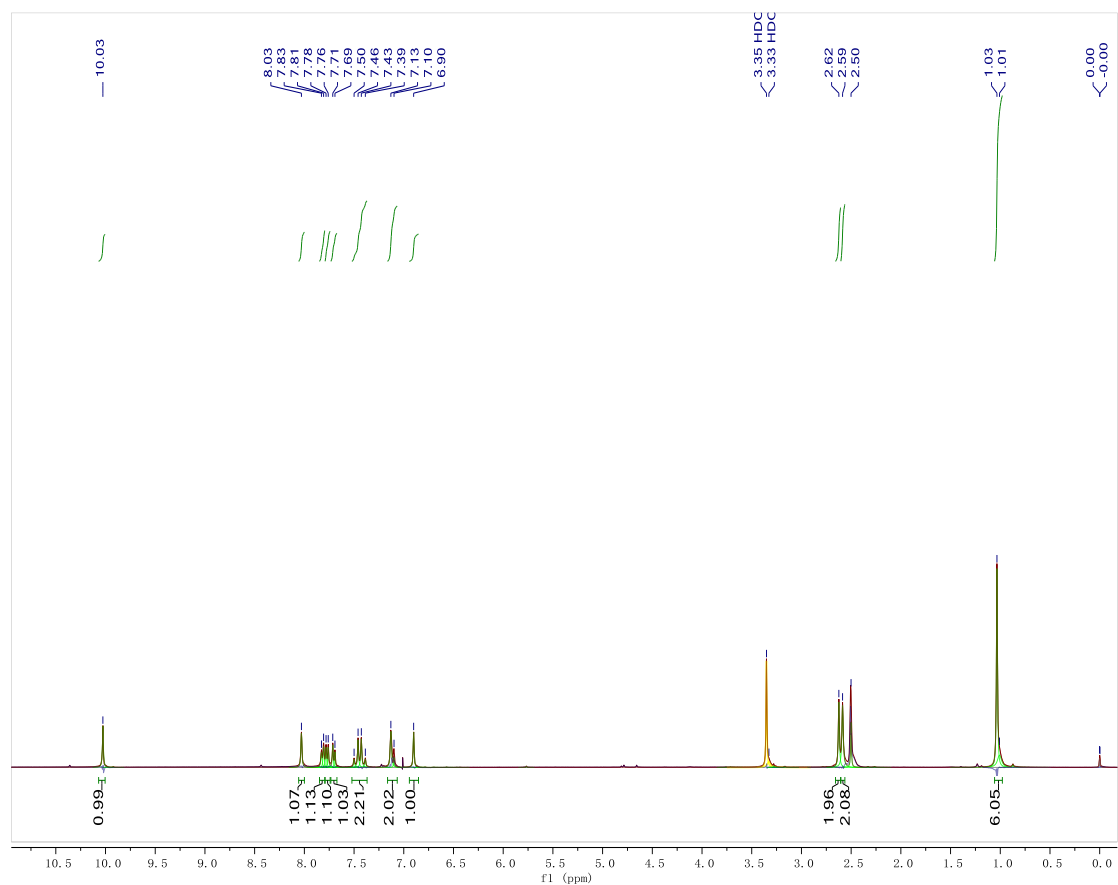

Fig. S7 <sup>1</sup>H NMR spectrum of the compound DCI-OH

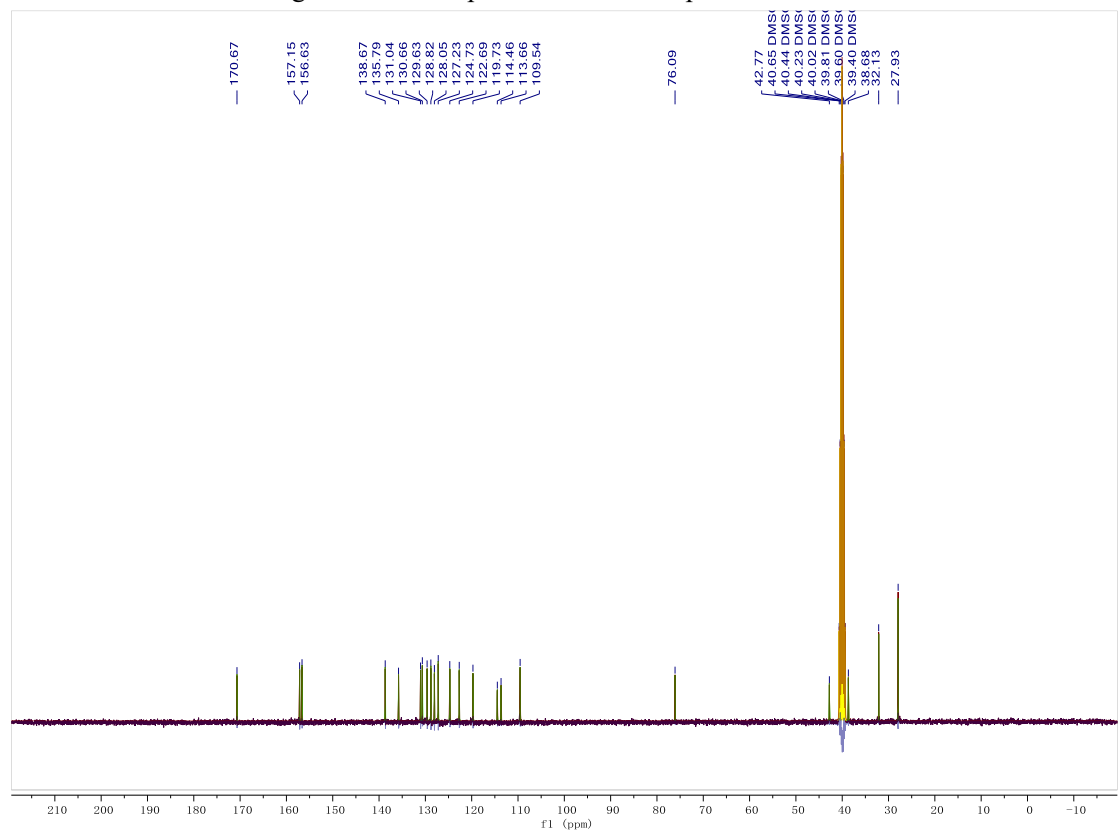

Fig. S8 <sup>13</sup>C NMR spectrum of the compound DCI-OH

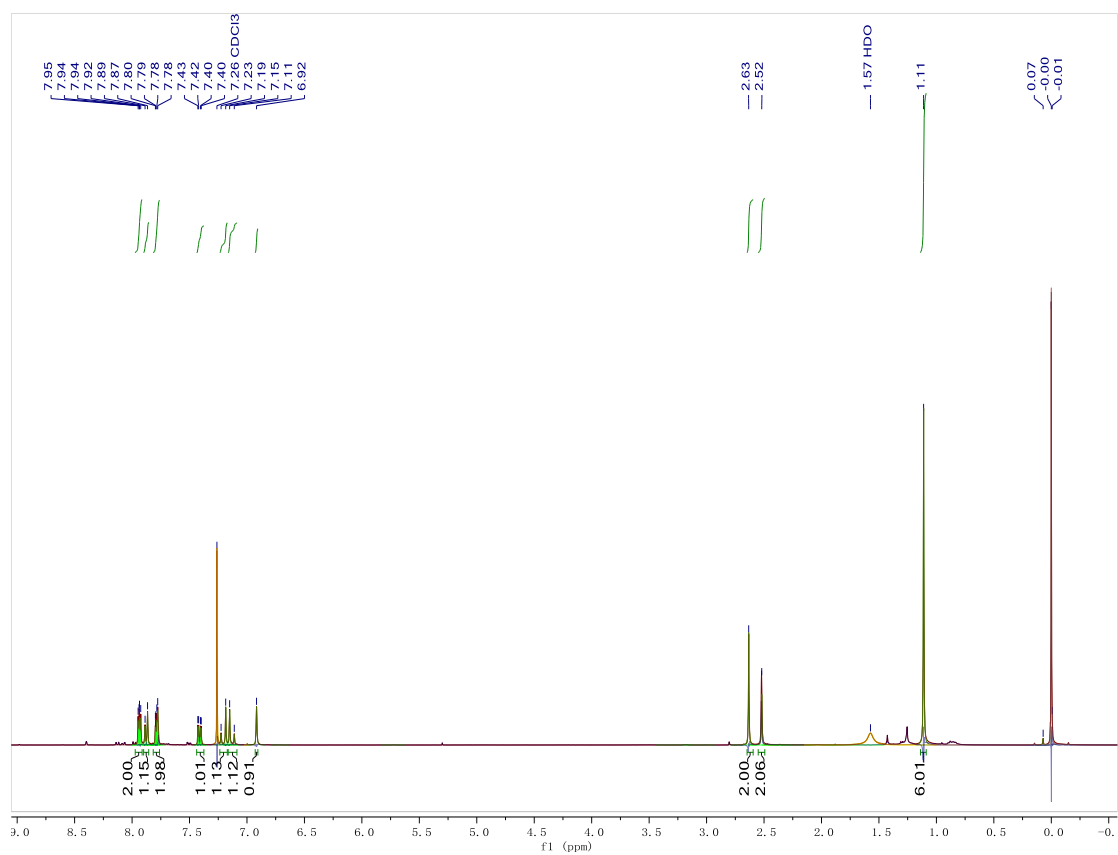

Fig. S9 <sup>1</sup>H NMR spectrum of the compound DCI-OH

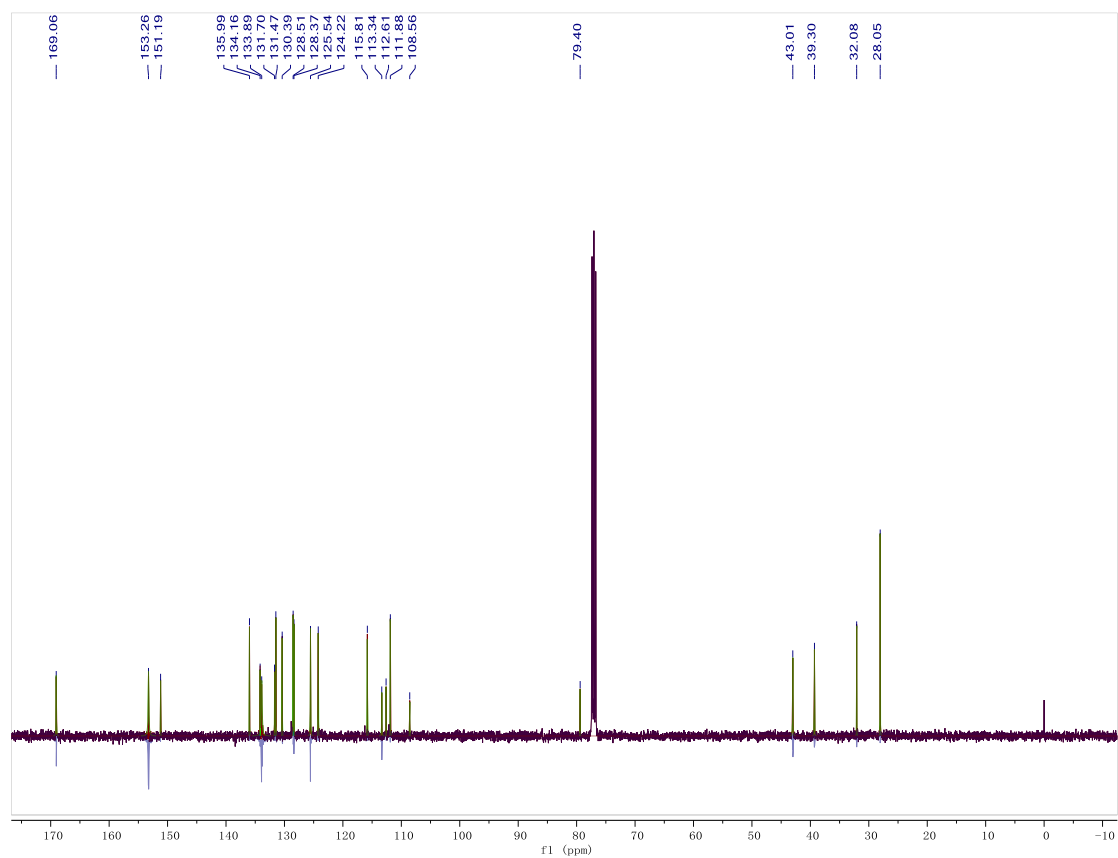

Fig. S10 <sup>13</sup>C NMR spectrum of the compound DCI-NCN

13:56:23  
190905\_ZRQ\_0638 4 (0.069) Cm (3:24)

05-Sep-2019  
TOF MS ES+  
2.06e4

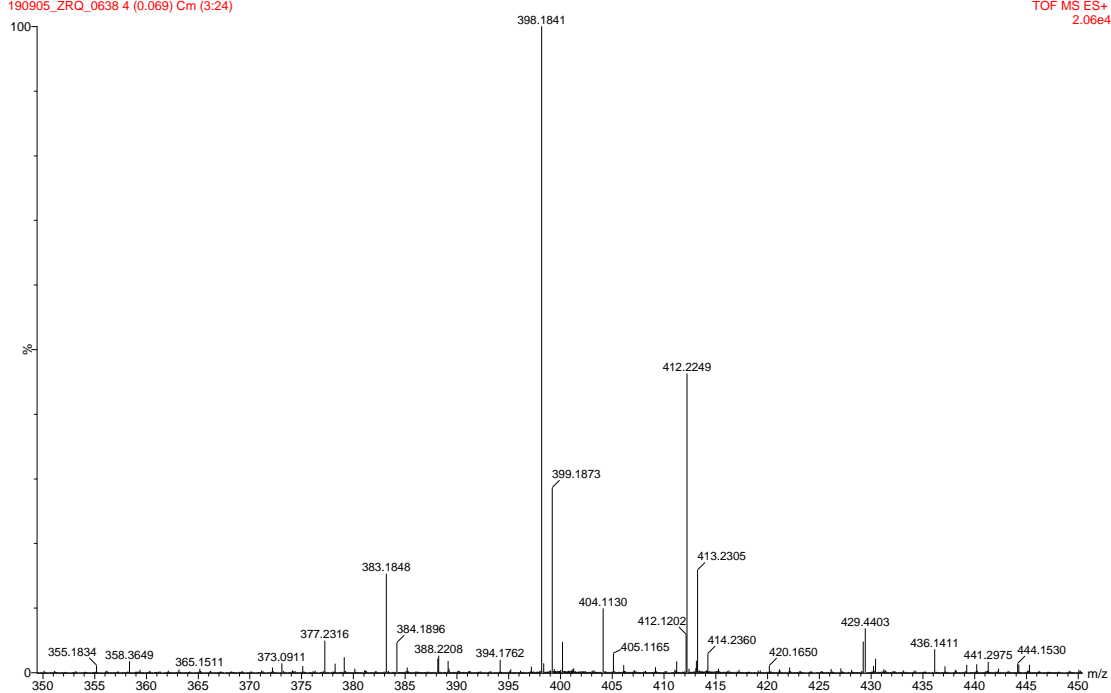

Fig. S11 HRMS spectrum of the compound DCI-NCN

## Reference

1. W. Sun, J. Fan, C. Hu, J. Cao, H. Zhang, X. Xiong, J. Wang, S. Cui, S. Sun and X. Peng, *Chem Commun (Camb)*, 2013, **49**, 3890-3892.
2. K. Xiang, Y. Liu, C. Li, B. Tian, T. Tong and J. Zhang, *Dyes and Pigments*, 2015, **123**, 78-84.
3. J. Men, X. Yang, H. Zhang and J. Zhou, *Dyes and Pigments*, 2018, **153**, 206-212.
4. M. Qian, L. Zhang, Z. Pu, J. Xia, L. Chen, Y. Xia, H. Cui, J. Wang and X. Peng, *Journal of Materials Chemistry B*, 2018, **6**, 7916-7925.
5. B. Gu, W. Su, L. Huang, C. Wu, X. Duan, Y. Li, H. Xu, Z. Huang, H. Li and S. Yao, *Sensors and Actuators B: Chemical*, 2018, **255**, 2347-2355.
6. G. Yang, J. Zhang, S. Zhu, Y. Wang, X. Feng, M. Yan and J. Yu, *Sensors and Actuators B: Chemical*, 2018, **261**, 51-57.
7. E. Karakus, M. Ucuncu and M. Emrullahoglu, *Anal Chem*, 2016, **88**, 1039-1043.
